# Supplementary material
Source: PubMed Central journal article supplement (PMC5742557)

**Section F****Preferences for Customary Routine and Activities**

**F0300. Should Interview for Daily and Activity Preferences be Conducted?** - Attempt to interview all residents able to communicate. If resident is unable to complete, attempt to complete interview with family member or significant other

Enter Code

0. **No** (resident is rarely/never understood and family/significant other not available) → Skip to and complete F0800, Staff Assessment of Daily and Activity Preferences
1. **Yes** → Continue to F0400, Interview for Daily Preferences

**F0400. Interview for Daily Preferences**

Show resident the response options and say: "**While you are in this facility...**"

↓ Enter Codes in Boxes

**Coding:**

1. **Very important**
2. **Somewhat important**
3. **Not very important**
4. **Not important at all**
5. **Important, but can't do or no choice**
9. **No response or non-responsive**

- |                          |                                                                                                                            |
|--------------------------|----------------------------------------------------------------------------------------------------------------------------|
| <input type="checkbox"/> | <b>A.</b> how important is it to you to <b>choose what clothes to wear?</b>                                                |
| <input type="checkbox"/> | <b>B.</b> how important is it to you to <b>take care of your personal belongings or things?</b>                            |
| <input type="checkbox"/> | <b>C.</b> how important is it to you to <b>choose between a tub bath, shower, bed bath, or sponge bath?</b>                |
| <input type="checkbox"/> | <b>D.</b> how important is it to you to <b>have snacks available between meals?</b>                                        |
| <input type="checkbox"/> | <b>E.</b> how important is it to you to <b>choose your own bedtime?</b>                                                    |
| <input type="checkbox"/> | <b>F.</b> how important is it to you to <b>have your family or a close friend involved in discussions about your care?</b> |
| <input type="checkbox"/> | <b>G.</b> how important is it to you to <b>be able to use the phone in private?</b>                                        |
| <input type="checkbox"/> | <b>H.</b> how important is it to you to <b>have a place to lock your things to keep them safe?</b>                         |

**F0500. Interview for Activity Preferences**

Show resident the response options and say: "**While you are in this facility...**"

↓ Enter Codes in Boxes

**Coding:**

1. **Very important**
2. **Somewhat important**
3. **Not very important**
4. **Not important at all**
5. **Important, but can't do or no choice**
9. **No response or non-responsive**

- |                          |                                                                                                      |
|--------------------------|------------------------------------------------------------------------------------------------------|
| <input type="checkbox"/> | <b>A.</b> how important is it to you to <b>have books, newspapers, and magazines to read?</b>        |
| <input type="checkbox"/> | <b>B.</b> how important is it to you to <b>listen to music you like?</b>                             |
| <input type="checkbox"/> | <b>C.</b> how important is it to you to <b>be around animals such as pets?</b>                       |
| <input type="checkbox"/> | <b>D.</b> how important is it to you to <b>keep up with the news?</b>                                |
| <input type="checkbox"/> | <b>E.</b> how important is it to you to <b>do things with groups of people?</b>                      |
| <input type="checkbox"/> | <b>F.</b> how important is it to you to <b>do your favorite activities?</b>                          |
| <input type="checkbox"/> | <b>G.</b> how important is it to you to <b>go outside to get fresh air when the weather is good?</b> |
| <input type="checkbox"/> | <b>H.</b> how important is it to you to <b>participate in religious services or practices?</b>       |

**F0600. Daily and Activity Preferences Primary Respondent**

Enter Code

Indicate **primary respondent** for Daily and Activity Preferences (F0400 and F0500)

1. **Resident**
2. **Family or significant other** (close friend or other representative)
9. **Interview could not be completed** by resident or family/significant other ("No response" to 3 or more items")

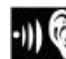

Supplement: NIHMS911047-supplement-Interview.pdf [file NIHMS911047-supplement-Interview.pdf]
